# Supplementary material
Source: PubMed Central journal article supplement (PMC5896781)
Supplement: NIHMS946202-supplement-001887_-_Supplemental_Material.pdf [file NIHMS946202-supplement-001887_-_Supplemental_Material.pdf]

## Supplemental Material

### Methods – Whole exome sequencing

DNA was extracted from peripheral blood leukocytes using Puregene reagents (Gentra Systems Inc., Minnesota, USA). WES was performed in collaboration with the Regeneron Genetics Center (RGC) or the PAH Biobank at Cincinnati Children's Hospital Medical Center. In brief, genomic DNA was prepared with a customized reagent kit from Kapa Biosystems and captured using the NimbleGen SeqCap VCRome 2 exome capture reagent or xGen lockdown probes. Samples were sequenced on the Illumina HiSeq 2500 platform with v4 chemistry, generating 75bp or 76bp pair-end reads. Patient DNA samples sequenced at the PAH Biobank/Cincinnati Children's Hospital Medical Center were prepared with the Clontech Advantage II kit and enriched using the NimbleGen SeqCap EZ Exome V2 capture reagent. Samples were sequenced using 125 bp paired-end sequencing on the Illumina HiSeq 2500 platform. We aimed to reach a coverage of  $\geq 15x$  in  $\geq 90\%$  of targeted regions for all WES samples.

**Supplemental Table 1. Mutations in known PAH risk genes identified in 155 pediatric-onset patients. Patients are heterozygous for the indicated variants.**

| ID         | Gender | Age, dx or enrollment (y) | WHO class       | Associated medical conditions | Primary method of detection | Gene          | Mutation                        | Variant type | Inheritance    | Previously-reported? | Allele frequency (ExAC) | CADD | MetaSVM        | ACMG class (deleterious prediction) |
|------------|--------|---------------------------|-----------------|-------------------------------|-----------------------------|---------------|---------------------------------|--------------|----------------|----------------------|-------------------------|------|----------------|-------------------------------------|
| FPPH060    | F      | 9                         | 1.2.2           | HHT                           | Sanger                      | <i>ACVRL1</i> | 1450 C>T, 1450-1451 ins G       | LGD          | unknown        | Jones et al. 2014    | --- <sup>†</sup>        | 35   | .              | Likely Pathogenic                   |
| FPPH100    | F      | 18                        | 1.2.2           | HHT                           | Sanger                      | <i>ACVRL1</i> | c.C1385G;p.S462X                | LGD          | unknown        | Abdalla et al. 2004  | ---                     | 42   | .              | Pathogenic                          |
| FPPH4606*  | F      | unknown                   | 1.2.1           |                               | WES                         | <i>ACVRL1</i> | c.C1199T;p.A400V                | D-Mis        | paternal       | No                   | ---                     | 35   | D <sup>‡</sup> | Likely Pathogenic                   |
| JM0057     | M      | 5                         | 1.2.2           | HHT                           | WES                         | <i>ACVRL1</i> | c.G955C;p.G319R                 | D-Mis        | <i>de novo</i> | Machado et al. 2015  | ---                     | 22.5 | D              | Likely Pathogenic                   |
| JM0035     | F      | 13                        | 1.1             |                               | WES                         | <i>BMPR1B</i> | c.T1328C;p.I443T                | Mis          | paternal       | rs752045710          | 1.63E-05                | 23.8 | T              | VUS (medium) <sup>§</sup>           |
| 15-059     | F      | 16                        | 1.2.1           |                               | WES                         | <i>BMPR2</i>  | c.1128+1G>A                     | LGD          | unknown        | rs863223420          | ---                     | 26.5 | .              | Pathogenic                          |
| FPPH065    | F      | 11                        | 1.2.1           |                               | Sanger                      | <i>BMPR2</i>  | c.2410-2413delGTCA:p.V804Pfsx1  | LGD          | paternal       | Machado et al. 2009  | ---                     | 35   | .              | Pathogenic                          |
| FPPH0709   | F      | 12                        | 1.2.1           |                               | Sanger                      | <i>BMPR2</i>  | 247+1delCAAGTG                  | LGD          | unknown        | Machado et al. 2015  | ---                     | 24   | .              | Pathogenic                          |
| FPPH083    | F      | 12                        | 1.2.1           |                               | Sanger                      | <i>BMPR2</i>  | del exon 2-3                    | LGD          | unknown        | Pfarr et al. 2011    | ---                     | .    | .              | Pathogenic                          |
| FPPH089    | F      | 17                        | 1.2.1           |                               | Sanger                      | <i>BMPR2</i>  | c.189-209del21:p.delSTCYGLW     | LGD          | maternal       | Machado et al. 2009  | ---                     | 21.9 | .              | Pathogenic                          |
| FPPH1001   | F      | 18                        | 1.2.1           |                               | Sanger                      | <i>BMPR2</i>  | c.1099-1103 delGGGGA:p.E368fsx1 | LGD          | unknown        | Machado et al. 2009  | ---                     | 35   | .              | Pathogenic                          |
| FPPH131-01 | M      | 1.5                       | 1.2.1           |                               | Sanger                      | <i>BMPR2</i>  | del exon 2-3                    | LGD          | maternal       | Pfarr et al. 2011    | ---                     | .    | .              | Pathogenic                          |
| FPPH137-01 | M      | 18                        | 1.2.1           |                               | Sanger                      | <i>BMPR2</i>  | c.C631T;p.R211X                 | LGD          | unknown        | Thomson et al. 2000  | ---                     | 42   | .              | Pathogenic                          |
| FPPH3407   | F      | 16 (postmortem)           | 1.2.1           |                               | Sanger                      | <i>BMPR2</i>  | c.637C>T;p.R213X                | LGD          | unknown        | Morisaki et al. 2004 | ---                     | 35   | .              | Pathogenic                          |
| FPPH3711   | F      | 1.5                       | 1.2.1           |                               | Sanger                      | <i>BMPR2</i>  | c.1214delA:p.D405fsx6           | LGD          | paternal       | Machado et al. 2009  | ---                     | .    | .              | Likely Pathogenic                   |
| FPPH4206   | M      | 35                        | 1.2.1           |                               | Sanger                      | <i>BMPR2</i>  | c.2441-2442delAC:p.H814fsx2     | LGD          | unknown        | Machado et al. 2009  | ---                     | 35   | .              | Likely Pathogenic                   |
| FPPH5403   | F      | 9                         | 1.2.1           |                               | Sanger                      | <i>BMPR2</i>  | c.248-5delTATAGGinsAC           | LGD          | maternal       | No                   | ---                     | .    | .              | Likely Pathogenic                   |
| JM1101     | F      | 12                        | 1.2.1           |                               | WES                         | <i>BMPR2</i>  | c.C961T;p.R321X                 | LGD          | unknown        | Koehler et al. 2004  | ---                     | 40   | .              | Likely Pathogenic                   |
| JM860      | M      | 16                        | 1.2.1           |                               | WES                         | <i>BMPR2</i>  | c.622-2A>C                      | LGD          | unknown        | No                   | ---                     | 24.6 | .              | Likely Pathogenic                   |
| 15-051*    | F      | 4                         | 1.2.1/<br>1.2.2 |                               | WES                         | <i>BMPR2</i>  | c.T295C;p.C99R                  | D-Mis        | maternal       | Machado et al. 2006  | ---                     | 25.8 | D              | Likely Pathogenic                   |

| ID         | Gender | Age, dx or enrollment (y) | WHO class       | Associated medical conditions | Primary method of detection | Gene         | Mutation                      | Variant type | Inheritance    | Previously-reported? | Allele frequency (ExAC) | CADD  | MetaSVM | ACMG class (deleterious prediction) |
|------------|--------|---------------------------|-----------------|-------------------------------|-----------------------------|--------------|-------------------------------|--------------|----------------|----------------------|-------------------------|-------|---------|-------------------------------------|
| FPPH0111   | F      | 11                        | 1.2.1           |                               | Sanger                      | <i>BMPR2</i> | c.C1471T;p.R491W              | D-Mis        | paternal       | Deng et al. 2000     | ---                     | 24.8  | D       | Pathogenic                          |
| FPPH070    | F      | 15                        | 1.2.1           |                               | Sanger                      | <i>BMPR2</i> | c.G932A;p.G311E               | D-Mis        | maternal       | Machado et al. 2009  | ---                     | 33    | D       | Pathogenic                          |
| FPPH0801   | F      | 9                         | 1.2.1           |                               | Sanger                      | <i>BMPR2</i> | c.C1471T;p.R491W              | D-Mis        | paternal       | Deng et al. 2000     | ---                     | 24.8  | D       | Pathogenic                          |
| JM0047     | M      | 8                         | 1.2.1           |                               | WES                         | <i>BMPR2</i> | c.G995C;p.R332P               | D-Mis        | unknown        | No                   | ---                     | 34    | D       | Likely Pathogenic                   |
| JM1088     | F      | 13                        | 1.2.1           |                               | WES                         | <i>BMPR2</i> | c.C1585T;p.R529C              | D-Mis        | maternal       | Machado et al. 2015  | 4.94E-05                | 34    | D       | Pathogenic                          |
| JM1334     | F      | 12                        | 1.2.1           |                               | WES                         | <i>BMPR2</i> | c.T295C;p.C99R                | D-Mis        | unknown        | Machado et al. 2006  | ---                     | 19.31 | D       | Likely Pathogenic                   |
| JM1342     | M      | 8                         | 1.2.1           |                               | WES                         | <i>BMPR2</i> | c.T297G;p.C99W                | D-Mis        | maternal       | Machado et al. 2015  | ---                     | 26.4  | D       | Likely Pathogenic                   |
| JM160      | M      | 11                        | 1.2.1           |                               | WES                         | <i>BMPR2</i> | c.G1472A;p.R491Q              | D-Mis        | unknown        | Deng et al. 2000     | ---                     | 35    | D       | Likely Pathogenic                   |
| JM365      | F      | 5                         | 1.2.1           |                               | WES                         | <i>BMPR2</i> | c.A200G;p.Y67C                | D-Mis        | maternal       | Morisaki et al. 2004 | ---                     | 26    | D       | Likely Pathogenic                   |
| JM625      | M      | 3                         | 1.2.1           |                               | WES                         | <i>BMPR2</i> | c.C1471T;p.R491W              | D-Mis        | <i>de novo</i> | Deng et al. 2000     | ---                     | 24.8  | D       | Pathogenic                          |
| JM733      | F      | 6                         | 1.2.1           | long QT syndrome              | WES                         | <i>BMPR2</i> | c.C1154G;p.P385R              | D-Mis        | unknown        | No                   | ---                     | 28.3  | D       | Likely Pathogenic                   |
| FPPH4606*  | F      | unknown                   | 1.2.1           |                               | WES                         | <i>BMPR2</i> | c.A1509C;p.E503D              | Mis          | paternal       | No                   | ---                     | 15.3  | T       | VUS (medium)                        |
| 15-043     | F      | 5                         | 1.2.2           |                               | WES                         | <i>KCNK3</i> | c.641_642insGCAGAC:p.214insQT | In-frame     | paternal       | No                   | ---                     | 13.25 | .       | VUS (low)                           |
| 15-033     | M      | 13                        | 1.2.2           |                               | WES                         | <i>KCNK3</i> | c.C675A;p.F225L               | Mis          | unknown        | No                   | ---                     | 22.4  | T       | VUS (medium)                        |
| FPPH138-01 | F      | 6                         | 1.2.2           |                               | WES                         | <i>KCNK3</i> | c.G544A:E182K                 | Mis          | paternal       | Ma et al. 2013       | ---                     | 32    | T       | Pathogenic                          |
| 15-051*    | F      | 4                         | 1.2.1/<br>1.2.2 |                               | WES                         | <i>SMAD9</i> | c.C880T;p.R294X               | LGD          | maternal       | Drake et al. 2011    | 8.24E-06                | 40    | .       | Pathogenic                          |
| 15-046     | F      | 7                         | 1.1             | small patella syndrome        | WES                         | <i>TBX4</i>  | c.702+1G>A                    | LGD          | unknown        | No                   | ---                     | 27.3  | .       | Likely Pathogenic                   |
| 15-062     | F      | 10                        | 1.1             |                               | WES                         | <i>TBX4</i>  | c.842dupC;p.S281fs            | LGD          | unknown        | No                   | ---                     | 34    | .       | Likely Pathogenic                   |
| FPPH4004   | M      | 10                        | 1.2             |                               | WES                         | <i>TBX4</i>  | c.498_500del;p.166_167delS    | In-frame     | paternal       | No                   | 8.31E-06                | 23.2  | .       | VUS (medium)                        |
| FPPH9002   | M      | 2                         | 1.1             |                               | WES                         | <i>TBX4</i>  | c.C1054T;p.R352X              | LGD          | <i>de novo</i> | No                   | ---                     | 35    | .       | VUS (high)                          |
| JM0064     | F      | 3                         | 1.1             |                               | WES                         | <i>TBX4</i>  | c.664delA;p.T222fs            | LGD          | maternal       | No                   | ---                     | 34    | .       | VUS (high)                          |

| ID     | Gender | Age, dx or enrollment (y) | WHO class | Associated medical conditions | Primary method of detection | Gene        | Mutation                                               | Variant type | Inheritance | Previously-reported? | Allele frequency (ExAC) | CADD | MetaSVM | ACMG class (deleterious prediction) |
|--------|--------|---------------------------|-----------|-------------------------------|-----------------------------|-------------|--------------------------------------------------------|--------------|-------------|----------------------|-------------------------|------|---------|-------------------------------------|
| JM358  | F      | 1.5                       | 1.1       |                               | WES                         | <i>TBX4</i> | c.C577T:p.Q193X                                        | LGD          | maternal    | No                   | ---                     | 38   | .       | Likely Pathogenic                   |
| JM587  | M      | 1.5                       | 1.1       |                               | WES                         | <i>TBX4</i> | chr17:59,534,897-59,560,878 25.9kb (exon 3-9) deletion | LGD          | unknown     | No                   | ---                     | .    | .       | Likely Pathogenic                   |
| JM655  | F      | 5                         | 1.1       |                               | WES                         | <i>TBX4</i> | c.507_512del;p.169_171del                              | In-frame     | paternal    | No                   | ---                     | 20.8 | .       | VUS (medium)                        |
| JM921  | M      | 0.6                       | 1.1       |                               | WES                         | <i>TBX4</i> | c.148delC:p.P50fs                                      | LGD          | maternal    | No                   | ---                     | 25.5 | .       | Likely Pathogenic                   |
| JM0034 | F      | 14                        | 1.1       |                               | WES                         | <i>TBX4</i> | c.C292G:p.P98A                                         | D-Mis        | maternal    | No                   | ---                     | 27.8 | D       | VUS (high)                          |
| JM1341 | F      | 1                         | 1.1       |                               | WES                         | <i>TBX4</i> | c.A569C:p.H190P                                        | D-Mis        | unknown     | No                   | ---                     | 24.1 | D       | Likely Pathogenic                   |
| JM1441 | F      | 14                        | 1.1       |                               | WES                         | <i>TBX4</i> | c.A380C:p.Y127S                                        | D-Mis        | paternal    | No                   | ---                     | 27.6 | D       | Likely Pathogenic                   |

Abbreviations: Age at dx, age at diagnosis; HHT, hereditary hemorrhagic telangiectasia; ACMG, American College of Medical Genetics; LGD, likely gene damaging; Mis, missense; D-Mis, damaging missense predicted by MetaSVM; VUS, variant of unknown significance.

\*patient carries variants in both *BMPR2* and *ACVRL*.

†---, mutation not present in ExAC

‡Annotation toolkit predictions: B, benign; T, tolerant; P, possibly damaging; D, damaging; ., mutation class not included in toolkit.

§Deleteriousness prediction criteria if not ACMG classification “pathogenic” or “likely pathogenic”: high= LGD or D-Mis plus CADD score $\geq$ 15; medium= D-Mis or CADD $\geq$ 15.

**Supplemental Table 2. Mutations in known PAH risk genes identified in 257 adult-onset patients. Patients are heterozygous for the indicated variants unless noted.**

| ID          | Gender | Age, dx or enrollment (y) | WHO class | Associated medical conditions             | Primary method of detection | Gene          | Mutation                  | Variant type | Inheritance                | Previously-reported?   | Allele frequency (ExAC) | CADD  | MetaSVM | ACMG class (deleterious prediction) |
|-------------|--------|---------------------------|-----------|-------------------------------------------|-----------------------------|---------------|---------------------------|--------------|----------------------------|------------------------|-------------------------|-------|---------|-------------------------------------|
| FPPH082     | M      | 29                        | 1.2.2     | HHT                                       | Sanger                      | <i>ACVRL1</i> | c.C1435T: p.R479X         | LGD          | paternal                   | Machado et al. 2009    | ---†                    | 43    | .       | Likely Pathogenic                   |
| FPPH110     | F      | 42                        | 1.2.2     | HHT                                       | Sanger                      | <i>ACVRL1</i> | c.1031G>A: p.C344Y        | D-Mis        | unknown                    | Abdalla et al. 2000    | ---                     | 31    | D‡      | Likely Pathogenic                   |
| FPPH139-01  | F      | 20                        | 1.2.2     |                                           | Sanger                      | <i>ACVRL1</i> | c.1031G>A: p.C344Y        | D-Mis        | unknown                    | Abdalla et al. 2000    | ---                     | 31    | D       | Pathogenic                          |
| FPPH091     | F      | 44                        | 1.2.2     | HHT                                       | Sanger                      | <i>ACVRL1</i> | c.C1120T: p.R374W         | D-Mis        | unknown                    | Berg et al. 1997       | ---                     | 29.4  | D       | Pathogenic                          |
| JM120       | M      | 29                        | 1.2.2     | PVOD                                      | WES                         | <i>ACVRL1</i> | c.C139T: p.R47W           | D-Mis        | maternal                   | No                     | 4.50E-05                | 24.1  | D       | Pathogenic                          |
| JM1348      | F      | 32                        | 1.2.2     | HHT                                       | WES                         | <i>ACVRL1</i> | c.G1451A: p.R484Q         | D-Mis        | unknown                    | Trembath et al. 2001   | ---                     | 23    | D       | Pathogenic                          |
| FPPH172-1   | F      | 33                        | 1.2.2     | HHT                                       | Sanger                      | <i>ACVRL1</i> | c.1231C>T: p.R411W        | D-Mis        | unknown                    | Trembath et al. 2001   | 8.00E-06                | 35    | D       | Pathogenic                          |
| FPPH160-01* | F      | 48                        | 1.2.2     |                                           | WES                         | <i>ACVRL1</i> | c.C1376T: p.P459L         | Mis          | unknown                    | No                     | 1.65E-05                | 24.7  | T       | Pathogenic                          |
| FPPH111     | F      | 34                        | 1.2.1     |                                           | Sanger                      | <i>BMPR2</i>  | c.248-2A>G                | LGD          | maternal                   | Machado et al. 2009    | ---                     | 23.6  | .       | Pathogenic                          |
| FPPH114     | M      | unknown                   | 1.2.1     |                                           | Sanger                      | <i>BMPR2</i>  | c.418+3A>T                | LGD          | unknown                    | Machado et al. 2006    | ---                     | 14.14 | .       | Pathogenic                          |
| FPPH4413    | F      | 24                        | 1.2.1     |                                           | Sanger                      | <i>BMPR2</i>  | c.418+5G>A                | LGD          | unknown                    | Rosenzweig et al. 2008 | ---                     | 17.27 | .       | Pathogenic                          |
| FPPH4905    | F      | unknown                   | 1.2.1     |                                           | Sanger                      | <i>BMPR2</i>  | c.418+5G>A                | LGD          | unknown                    | Rosenzweig et al. 2008 | ---                     | 17.27 | .       | Pathogenic                          |
| FPPH059     | F      | 50                        | 1.2.1     |                                           | Sanger                      | <i>BMPR2</i>  | c.968-5A>G                | LGD          | maternal                   | Machado et al. 2009    | ---                     | 13.39 | .       | Pathogenic                          |
| FPPH3208    | M      | 43                        | 1.2.1     |                                           | Sanger                      | <i>BMPR2</i>  | c. G727T: p.E243X         | LGD          | paternal                   | Machado et al. 2001    | ---                     | 43    | .       | Likely Pathogenic                   |
| FPPH2803    | F      | 41                        | 1.2.1     |                                           | Sanger                      | <i>BMPR2</i>  | c.1095delC: p.R365fsx8    | LGD          | maternal                   | Machado et al. 2009    | ---                     | 29.4. | .       | Pathogenic                          |
| JM629       | M      | 26                        | 1.2.1     | kyphoscoliotic heart disease, sleep apnea | WES                         | <i>BMPR2</i>  | c.1129-1G>A               | LGD          | unknown                    | rs863223420            | ---                     | 26.5  | .       | Likely Pathogenic                   |
| FPPH2301    | F      | 33                        | 1.2.1     |                                           | Sanger                      | <i>BMPR2</i>  | c.1129-3C>G               | LGD          | unknown                    | Machado et al. 2001    | ---                     | 27    | .       | Pathogenic                          |
| FPPH156-01  | F      | 28                        | 1.2.1     |                                           | Sanger                      | <i>BMPR2</i>  | c.1142insA: p.R381Kfsx17  | LGD          | unknown                    | No                     | ---                     | 35    | .       | Pathogenic                          |
| JM96        | F      | 32                        | 1.2.1     | asthma                                    | WES                         | <i>BMPR2</i>  | c.115delC: p.P39fs        | LGD          | unknown                    | No                     | ---                     | 33    | .       | Likely Pathogenic                   |
| FPPH5301    | F      | 37                        | 1.2.1     |                                           | Sanger                      | <i>BMPR2</i>  | c.1189-1190delTG: p.C347X | LGD          | maternal or <i>de novo</i> | Machado et al. 2009    | ---                     | 35    | .       | Likely Pathogenic                   |

| ID           | Gender | Age, dx or enrollment (y) | WHO class | Associated medical conditions | Primary method of detection | Gene         | Mutation                        | Variant type | Inheritance                | Previously-reported? | Allele frequency (ExAC) | CADD  | MetaSVM | ACMG class (deleterious prediction) |
|--------------|--------|---------------------------|-----------|-------------------------------|-----------------------------|--------------|---------------------------------|--------------|----------------------------|----------------------|-------------------------|-------|---------|-------------------------------------|
| FPPH1101     | F      | 25                        | 1.2.1     |                               | Sanger                      | <i>BMPR2</i> | c.1248-1251del ATTT:p.F417fs    | LGD          | paternal                   | Machado et al. 2009  | ---                     | 35    | .       | Pathogenic                          |
| SPH586NW2874 | F      | 64                        | 1.2.1     |                               | WES                         | <i>BMPR2</i> | c.1277-1G>-                     | LGD          | unknown                    | No                   | ---                     | 24.4  | .       | Likely Pathogenic                   |
| JM883        | F      | 35                        | 1.2.1     |                               | WES                         | <i>BMPR2</i> | c.1604delG: p.R535fs            | LGD          | unknown                    | No                   | ---                     | 34    | .       | Likely Pathogenic                   |
| FPPH081      | M      | 28                        | 1.2.1     |                               | Sanger                      | <i>BMPR2</i> | c.186insTACC: p.G63fsx1         | LGD          | maternal                   | Machado et al. 2009  | ---                     | 14.98 | .       | Pathogenic                          |
| JM100        | F      | 22                        | 1.2.1     | deaf/mute                     | WES                         | <i>BMPR2</i> | c.2305delC: p.R770Gfs           | LGD          | unknown                    | No                   | ---                     | 35    | .       | Likely Pathogenic                   |
| FPPH068      | F      | 32                        | 1.2.1     |                               | Sanger                      | <i>BMPR2</i> | c.261insA: p.87fsx9             | LGD          | unknown                    | Machado et al. 2009  | ---                     | 34    | .       | Pathogenic                          |
| FPPH132-01   | M      | 36                        | 1.2.1     |                               | Sanger                      | <i>BMPR2</i> | c.354-355TA>AG: p.C118X         | LGD          | paternal                   | Machado et al. 2009  | ---                     | 27.9  | .       | Likely Pathogenic                   |
| FPPH1703     | F      | 48                        | 1.2.1     |                               | Sanger                      | <i>BMPR2</i> | c.507-510delCTTTinsAAA: p.C169X | LGD          | maternal                   | Deng et al. 2000     | ---                     | .     | .       | Pathogenic                          |
| FPPH2201     | M      | 31                        | 1.2.1     |                               | Sanger                      | <i>BMPR2</i> | c.690-691delAGinsT: p.K239fsx21 | LGD          | unknown                    | Machado et al. 2009  | ---                     | 33    | .       | Pathogenic                          |
| SPH604HK2894 | F      | 40                        | 1.2.1     |                               | WES                         | <i>BMPR2</i> | c.918_921del: p.H306fs          | LGD          | unknown                    | No                   | ---                     | .     | .       | Pathogenic                          |
| JM118        | F      | 39                        | 1.2.1     | sleep apnea                   | WES                         | <i>BMPR2</i> | c.C1750T: p.R584X               | LGD          | unknown                    | Machado et al. 2001  | ---                     | 40    | .       | Pathogenic                          |
| FPPH1804     | F      | 56                        | 1.2.1     |                               | Sanger                      | <i>BMPR2</i> | c.C2617T: p.R873X               | LGD          | unknown                    | Deng et al. 2000     | ---                     | 0.44  | .       | Likely Pathogenic                   |
| FPPH4701     | M      | 34                        | 1.2.1     |                               | Sanger                      | <i>BMPR2</i> | c.C2695T: p.R899X               | LGD          | unknown                    | Lane et al. 2000     | ---                     | 39    | .       | Pathogenic                          |
| SPH966EM5361 | F      | 43                        | 1.2.1     |                               | WES                         | <i>BMPR2</i> | c.C2695T: p.R899X               | LGD          | unknown                    | Austin et al. 1993   | ---                     | 43    | .       | Likely Pathogenic                   |
| FPPH0401     | F      | unknown                   | 1.2.1     | teratoma                      | Sanger                      | <i>BMPR2</i> | c.C439T: p.R147X                | LGD          | paternal                   | Machado et al. 2001  | ---                     | 38    | .       | Pathogenic                          |
| JM863        | M      | 49                        | 1.2.1     |                               | WES                         | <i>BMPR2</i> | c.C470A: p.S157X                | LGD          | unknown                    | No                   | ---                     | 35    | .       | Likely Pathogenic                   |
| JM1427       | M      | 30                        | 1.2.1     |                               | WES                         | <i>BMPR2</i> | c.C541T: p.Q181X                | LGD          | unknown                    | Machado et al. 2015  | ---                     | 35    | .       | Likely Pathogenic                   |
| FPPH093      | F      | unknown                   | 1.2.1     | appetite suppressant          | Sanger                      | <i>BMPR2</i> | c.C631T: p.R211X                | LGD          | unknown                    | Thomson et al. 2000  | ---                     | 42    | .       | Pathogenic                          |
| JM766        | F      | 28                        | 1.2.1     |                               | WES                         | <i>BMPR2</i> | c.C631T: p.R211X                | LGD          | unknown                    | Thomson et al. 2000  | ---                     | 36    | .       | Likely Pathogenic                   |
| FPPH2003     | F      | 35                        | 1.2.1     |                               | Sanger                      | <i>BMPR2</i> | c.C961T: p.R321X                | LGD          | maternal                   | Koehler et al. 2004  | ---                     | 40    | .       | Likely Pathogenic                   |
| FPPH4303     | M      | 47                        | 1.2.1     |                               | Sanger                      | <i>BMPR2</i> | c.C961T: p.R321X                | LGD          | paternal or <i>de novo</i> | Koehler et al. 2004  | ---                     | 40    | .       | Likely Pathogenic                   |

| ID           | Gender | Age, dx or enrollment (y) | WHO class | Associated medical conditions | Primary method of detection | Gene         | Mutation                                                  | Variant type | Inheritance                | Previously-reported?   | Allele frequency (ExAC) | CADD | MetaSVM | ACMG class (deleterious prediction) |
|--------------|--------|---------------------------|-----------|-------------------------------|-----------------------------|--------------|-----------------------------------------------------------|--------------|----------------------------|------------------------|-------------------------|------|---------|-------------------------------------|
| FPPH116      | F      | 23                        | 1.2.1     |                               | Sanger                      | <i>BMPR2</i> | c.C994T: p.R332X                                          | LGD          | unknown                    | Thomson et al. 2000    | ---                     | 38   | .       | Pathogenic                          |
| FPPH1201     | M      | 29                        | 1.2.1     |                               | Sanger                      | <i>BMPR2</i> | c.C994T: p.R332X                                          | LGD          | unknown                    | Thomson et al. 2000    | ---                     | 38   | .       | Likely Pathogenic                   |
| SPH833MS5175 | F      | 44                        | 1.2.1     |                               | WES                         | <i>BMPR2</i> | c.C994T: p.R332X                                          | LGD          | unknown                    | Thomson et al. 2000    | ---                     | 36   | .       | Pathogenic                          |
| FPPH096      | F      | 20                        | 1.2.1     |                               | Sanger                      | <i>BMPR2</i> | c.G1398A: p.W466X                                         | LGD          | paternal or <i>de novo</i> | Koehler et al. 2004    | ---                     | .    | .       | Pathogenic                          |
| JM675        | F      | 37                        | 1.2.1     |                               | WES                         | <i>BMPR2</i> | c.G210A: p.W70X                                           | LGD          | unknown                    | No                     | ---                     | 37   | .       | Likely Pathogenic                   |
| JM87         | M      | 50                        | 1.2.1     | hypothyroidism                | WES                         | <i>BMPR2</i> | c.T1146G: p.Y382X                                         | LGD          | unknown                    | Rosenzweig et al. 2008 | ---                     | 27.8 | .       | Pathogenic                          |
| FPPH125      | F      | 39                        | 1.2.1     |                               | Sanger                      | <i>BMPR2</i> | c.T201G: p.Y67X                                           | LGD          | unknown                    | Rosenzweig et al. 2008 | ---                     | 35   | .       | Pathogenic                          |
| FPPH134-01   | F      | 48                        | 1.2.1     |                               | Sanger                      | <i>BMPR2</i> | chr2:203,142,934-203,424,670 281.7kb (exon 1-12) deletion | LGD          | unknown                    | No                     | ---                     | .    | .       | Likely Pathogenic                   |
| FPPH095      | F      | 37                        | 1.2.1     |                               | Sanger                      | <i>BMPR2</i> | del exon 2, 3                                             | LGD          | paternal                   | Pfarr et al. 2011      | ---                     | .    | .       | Pathogenic                          |
| FPPH2501     | M      | 42                        | 1.2.1     |                               | Sanger                      | <i>BMPR2</i> | del exon 3                                                | LGD          | unknown                    | Pfarr et al. 2011      | ---                     | .    | .       | Pathogenic                          |
| FPPH0312     | F      | 57                        | 1.2.1     |                               | Sanger                      | <i>BMPR2</i> | deletion exons 4 & 5                                      | LGD          | unknown                    | Cogan et al. 2005      | ---                     | .    | .       | Pathogenic                          |
| FPPH0901     | F      | 30                        | 1.2.1     |                               | Sanger                      | <i>BMPR2</i> | deletion exons 4-10                                       | LGD          | paternal                   | No                     | ---                     | .    | .       | Pathogenic                          |
| FPPH4504     | F      | 23                        | 1.2.1     |                               | Sanger                      | <i>BMPR2</i> | c.G296A: p.C99Y                                           | D-Mis        | paternal                   | Machado et al. 2009    | ---                     | 27.7 | D       | Pathogenic                          |
| FPPH136-03   | F      | 22                        | 1.2.1     |                               | Sanger                      | <i>BMPR2</i> | c.A200G: p.Y67C                                           | D-Mis        | paternal                   | Morisaki et al. 2004   | ---                     | 17.2 | D       | VUS (high) §                        |
| FPPH077      | M      | 21                        | 1.2.1     |                               | Sanger                      | <i>BMPR2</i> | c.A200G: p.Y67C                                           | D-Mis        | paternal                   | Morisaki et al. 2004   | ---                     | 17.2 | D       | Pathogenic                          |
| FPPH2104     | F      | 29-39                     | 1.2.1     |                               | Sanger                      | <i>BMPR2</i> | c.C1471T: p.R491W                                         | D-Mis        | paternal                   | Deng et al. 2000       | ---                     | 24.8 | D       | Pathogenic                          |
| FPPH5201     | F      | 46                        | 1.2.1     |                               | Sanger                      | <i>BMPR2</i> | c.C250T: p.C84R                                           | D-Mis        | paternal                   | Machado et al. 2009    | ---                     | 27.8 | D       | Pathogenic                          |
| FPPH067      | F      | unknown                   | 1.2.1     |                               | Sanger                      | <i>BMPR2</i> | c.G1040A: p.C347Y                                         | D-Mis        | unknown                    | Lane et al. 2000       | ---                     | 28.5 | D       | VUS (high)                          |
| JM093        | F      | 43                        | 1.2.1     |                               | WES                         | <i>BMPR2</i> | c.G1040A: p.C347Y                                         | D-Mis        | paternal or <i>de novo</i> | Lane et al. 2000       | ---                     | 28.5 | D       | Pathogenic                          |
| FPPH108      | F      | 30                        | 1.2.1     |                               | Sanger                      | <i>BMPR2</i> | c.G1042A: p.V348E                                         | D-Mis        | unknown                    | Machado et al. 2009    | 4.53E-04                | 25.3 | D       | Pathogenic                          |
| SPH534UH2819 | F      | 23                        | 1.2.1     |                               | WES                         | <i>BMPR2</i> | c.G1156C: p.E386Q                                         | D-Mis        | paternal or <i>de novo</i> | Austin et al. 1993     | ---                     | 32   | D       | Likely Pathogenic                   |

| ID           | Gender | Age, dx or enrollment (y) | WHO class | Associated medical conditions     | Primary method of detection | Gene           | Mutation                                  | Variant type | Inheritance                | Previously-reported? | Allele frequency (ExAC) | CADD      | MetaSVM | ACMG class (deleterious prediction) |
|--------------|--------|---------------------------|-----------|-----------------------------------|-----------------------------|----------------|-------------------------------------------|--------------|----------------------------|----------------------|-------------------------|-----------|---------|-------------------------------------|
| FPPH1901     | F      | 32                        | 1.2.1     |                                   | Sanger                      | <i>BMPR2</i>   | c.G1472A: p.R491Q                         | D-Mis        | unknown                    | Deng et al. 2000     | ---                     | 35        | D       | Pathogenic                          |
| FPPH1401     | F      | 36                        | 1.2.1     |                                   | Sanger                      | <i>BMPR2</i>   | c.G248A: p.G83E                           | D-Mis        | maternal                   | Machado et al. 2009  | ---                     | 27.7      | D       | Pathogenic                          |
| FPPH092      | F      | 30                        | 1.2.1     |                                   | Sanger                      | <i>BMPR2</i>   | c.G350A: p.C117Y                          | D-Mis        | paternal                   | Thomson et al. 2000  | ---                     | 27.9      | D       | Pathogenic                          |
| FPPH1301     | F      | 23                        | 1.2.1     |                                   | Sanger                      | <i>BMPR2</i>   | c.T295C: p.C99R                           | D-Mis        | paternal or <i>de novo</i> | Machado et al. 2006  | ---                     | 19.3      | D       | VUS (high)                          |
| JM586        | M      | 72                        | 1.2.1     | hypothyroidism<br>prostate cancer | WES                         | <i>BMPR2</i>   | c.G674A: p.R225H                          | Mis          | unknown                    | rs148682262          | 0.0003                  | 24.8      | T       | VUS (medium)                        |
| FPPH6401     | F      | unknown                   | 1.2.2     | breast cancer                     | WES                         | <i>CAV1</i>    | c.471delC: p.D157fs                       | LGD          | unknown                    | No                   | ---                     | 33        | .       | Pathogenic                          |
| FPPH066      | M      | 50                        | 1.2       |                                   | WES                         | <i>EIF2AK4</i> | c.C1387T: p.R463X (homozygous)            | D-Mis        | unknown                    | Eyries et al. 2014   | 8.28E-06                | 38        | .       | Pathogenic                          |
| FPPH170-1    | M      | 35                        | 1.6       | PCH                               | WES                         | <i>EIF2AK4</i> | c.C3766T:p.R1256X;<br>c.1150dupG:p.S383fs | LGD;<br>LGD  | unknown                    | Best et al. 2014     | 0.0001;<br>3.31E-05     | 49;<br>32 | .       | Pathogenic                          |
| FPPH135-01   | F      | 37                        | 1.2.2     | HHT                               | WES                         | <i>ENG</i>     | c.714dupG: p.E239Gfs                      | LGD          | maternal or <i>de novo</i> | Bossler et al. 2006  | ---                     | 27.9      | .       | Pathogenic                          |
| SPH863DA5217 | F      | 39                        | 1.2.2     |                                   | WES                         | <i>SMAD9</i>   | c.G218A: p.R73H                           | D-Mis        | unknown                    | No                   | ---                     | 20.3      | D       | VUS (high)                          |
| FPPH1601     | M      | 33                        | 1.2       |                                   | WES                         | <i>TBX4</i>    | c.1115dupC: p.Pro372fs                    | LGD          | paternal                   | No                   | ---                     | 34        | .       | Likely Pathogenic                   |
| FPPH160-01*  | F      | 48                        | 1.2.2     |                                   | WES                         | <i>TBX4</i>    | c.G1055T: p.R352L                         | Mis          | unknown                    | rs747237133          | 8.40E-06                | 32        | T       | VUS (medium)                        |
| SPH627PH2920 | M      | 47                        | 1.1       |                                   | WES                         | <i>TBX4</i>    | c.G1207A: p.G403R                         | Mis          | unknown                    | rs146829316          | 0.0001                  | 27.1      | T       | VUS (medium)                        |

Abbreviations: Age at dx, age at diagnosis; HHT, hereditary hemorrhagic telangiectasia; PCH, pulmonary capillary hemangiomatosis; CF, cystic fibrosis; PVOD, pulmonary veno-occlusive disease; LGD, likely gene damaging; D-Mis, damaging missense predicted by MetaSVM; ACMG, American College of Medical Genetics.

\*patient carries variants in both *ACVRL* and *TBX4*.

†---, mutation not present in ExAC.

‡Annotation toolkit predictions: B, benign; T, tolerant; P, possibly damaging; D, damaging; ., mutation class not included in toolkit.

§Deleteriousness prediction criteria if not ACMG classification “pathogenic” or “likely pathogenic”: high= likely gene damaging or D-Mis plus CADD score $\geq$ 15; medium= D-Mis or CADD $\geq$ 15.



**Supplemental Table 3. Lack of enrichment of rare genetic variants in known PAH risk genes\*, excluding *BMPR2* and *TBX4*, in patients of European ancestry.**

|                               | Mutation type <sup>†</sup> | Observed in cases | Observed in controls (n=1319) | Enrichment rate | p-value |
|-------------------------------|----------------------------|-------------------|-------------------------------|-----------------|---------|
| <b>Pediatric-onset (n=88)</b> | SYN                        | 2                 | 22                            | 1.36            | 0.66    |
|                               | LGD                        | 0                 | 2                             | 0               | 1       |
|                               | MIS                        | 4                 | 53                            | 1.13            | 0.78    |
|                               | D-Mis                      | 1                 | 21                            | 0.71            | 1       |
| <b>Adult-onset (n=160)</b>    | SYN                        | 5                 | 22                            | 1.87            | 0.21    |
|                               | LGD                        | 1                 | 2                             | 4.12            | 0.29    |
|                               | MIS                        | 4                 | 53                            | 0.62            | 0.52    |
|                               | D-Mis                      | 0                 | 21                            | 0               | 0.16    |

\**ACVRL1*, *BMPPR1A*, *BMPR1B*, *CAVI*, *EIF2AK4*, *ENG*, *KCNK3*, *SMAD9* and *SMAD4*

<sup>†</sup>SYN, synonymous; LGD, likely gene damaging; MIS, all missense; D-Mis, damaging missense predicted by MetaSVM.

**Supplemental Table 4. Enrichment of *de novo* LGD variants in very early-onset ( $\leq 5$  years of age) pediatric patients.**

| <b>Variant type*</b> | <b>Age <math>\leq 5</math>y<br/>(n=16)</b> | <b>Age <math>&gt;5-18</math>y<br/>(n=18)</b> | <b>Enrichment</b> | <b>p-value</b> |
|----------------------|--------------------------------------------|----------------------------------------------|-------------------|----------------|
| <b>SYN</b>           | 2                                          | 8                                            | 3.6               | 0.12           |
| <b>MIS</b>           | 10                                         | 16                                           | 1.4               | 0.44           |
| <b>D-Mis</b>         | 3                                          | 6                                            | 1.8               | 0.51           |
| <b>LGD</b>           | 6                                          | 0                                            | NA                | 0.01           |

\*SYN, synonymous; LGD, likely gene damaging; MIS, all missense; D-Mis, damaging missense predicted by MetaSVM.

**Supplemental Table 5. List of *de novo* LGD and missense variants in pediatric-onset IPAH trios (n=36).**

| Proband ID | Variant type       | Variant Class                          | Gene            | Transcript ID | Nucleotide change    | AA change         | ExAC     | pLI | ExAC mis-z | MetaSVM        | CADD | ExAC frequency | Deleterious prediction | Other medical conditions |
|------------|--------------------|----------------------------------------|-----------------|---------------|----------------------|-------------------|----------|-----|------------|----------------|------|----------------|------------------------|--------------------------|
| 15-002*    | D-Mis <sup>†</sup> | nonsynonymous SNV                      | <i>TUBB6</i>    | NM_001303527  | c.C40T               | p.R14W            | 5.11E-04 |     | 4.11       | D <sup>‡</sup> | 14.4 | 8.29E-06       | low                    |                          |
| 15-002*    | D-Mis              | nonsynonymous SNV                      | <i>ALDH9A1</i>  | NM_000696     | c.A545G              | p.Y182C           | 1.29E-05 |     | -0.19      | D              | 19.3 | 1.65E-05       | high                   |                          |
| 15-002*    | missense           | nonsynonymous SNV                      | <i>TCN2</i>     | NM_000355     | c.C1163T             | p.A388V           | 0.02     |     | -2.67      | T              | 1.62 | 4.12E-05       | low                    |                          |
| 15-006     | D-Mis              | nonsynonymous SNV                      | <i>KDM3B</i>    | NM_016604     | c.C3298T             | p.P1100S          | 1.00     |     | 4.99       | D              | 31.0 | ---            | high                   |                          |
| 15-028     | missense           | nonsynonymous SNV                      | <i>SEMA6D</i>   | NM_153618     | c.C1818G             | p.I606M           | 1.00     |     | 0.82       | T              | 11.8 | ---            | low                    |                          |
| 15-042     | D-Mis              | nonsynonymous SNV                      | <i>ITPR1</i>    | NM_001168272  | c.C3614T             | p.A1205V          | 1.00     |     | 5.75       | D              | 15.6 | 1.08E-05       | high                   |                          |
| 15-054*    | D-Mis              | nonsynonymous SNV                      | <i>EMID1</i>    | NM_001267895  | c.G1114A             | p.G372R           | 0.04     |     | -0.29      | D              | 21.0 | ---            | high                   |                          |
| 15-054*    | missense           | nonsynonymous SNV                      | <i>TF</i>       | NM_001063     | c.C1376T             | p.T459I           | 0.43     |     | 0.71       | T              | 14.0 | ---            | low                    |                          |
| JM0004*    | LGD                | stopgain                               | <i>ZNF620</i>   | NM_175888     | c.G74A               | p.W25X            | 6.83E-06 |     | -0.37      | .              | 16.2 | ---            | high                   |                          |
| JM0004*    | LGD                | frameshift_deletion                    | <i>AMOT</i>     | NM_001113490  | c.957delC            | p.S319fs          | 0.21     |     | -0.28      | .              | .    | ---            | high                   |                          |
| JM0008     | missense, LGD      | nonsynonymous SNV, frameshift_deletion | <i>ALPPL2</i>   | NM_031313     | c.C1565A, c.1561delG | p.T522N, p.G521fs | 6.22E-06 |     | 1.59       | T              | 6.6  | ---            | high                   | esophageal dysmotility   |
| JM0013     | D-Mis              | nonsynonymous SNV                      | <i>RBL2</i>     | NM_001323608  | c.A1067C             | p.E356A           | 0.96     |     | 0.58       | D              | 17.5 | 0              | high                   |                          |
| JM0023     | missense           | nonsynonymous SNV                      | <i>CARNS1</i>   | NM_020811     | c.C2305G             | p.R769G           | 0.02     |     | -0.65      | T              | 16.5 | ---            | medium                 |                          |
| JM0028*    | D-Mis              | nonsynonymous SNV                      | <i>MAPK6</i>    | NM_002748     | c.G1528A             | p.A510T           | 0.53     |     | 0.47       | D              | 19.4 | ---            | high                   |                          |
| JM0028*    | D-Mis              | nonsynonymous SNV                      | <i>TRH</i>      | NM_007117     | c.C253A              | p.H85N            | 9.18E-06 |     | 0.14       | D              | 20.5 | ---            | high                   |                          |
| JM0028*    | missense           | nonsynonymous SNV                      | <i>CSNK2A2</i>  | NM_001896     | c.A551G              | p.H184R           | 1.00     |     | 3.49       | T              | 15.0 | ---            | medium                 |                          |
| JM0035*    | missense           | nonsynonymous SNV                      | <i>MYO16</i>    | NM_001198950  | c.T1420C             | p.S474P           | 1.00     |     | 1.53       | T              | 0.99 | 0              | low                    |                          |
| JM0035*    | missense           | nonsynonymous SNV                      | <i>CNTN4</i>    | NM_001206956  | c.A722G              | p.H241R           | 1.00     |     | -0.64      | T              | 26.1 | 0              | medium                 |                          |
| JM0039     | missense           | nonsynonymous SNV                      | <i>MEFV</i>     | NM_000243     | c.C2281T             | p.R761C           | 1.12E-08 |     | -0.53      | T              | 9.07 | 7.42E-05       | low                    |                          |
| JM0042*    | missense           | nonsynonymous SNV                      | <i>CHID1</i>    | NM_001142675  | c.C217T              | p.R73W            | 0.00     |     | 0.58       | T              | 12.6 | ---            | low                    |                          |
| JM0042*    | missense           | nonsynonymous SNV                      | <i>RARS2</i>    | NM_020320     | c.A770G              | p.K257R           | 3.49E-06 |     | -0.48      | T              | 15.2 | ---            | medium                 |                          |
| JM0065     | missense           | nonsynonymous SNV                      | <i>CCDC40</i>   | NM_017950     | c.G2926A             | p.E976K           | 6.32E-11 |     | 0.14       | T              | 10.9 | ---            | low                    |                          |
| JM1307*    | missense           | nonsynonymous SNV                      | <i>NEU1</i>     | NM_000434     | c.C32G               | p.P11R            | 1.93E-05 |     | 1.85       | T              | 0.00 | 0              | low                    |                          |
| JM1307*    | LGD                | stoploss                               | <i>EMC8</i>     | NM_006067     | c.G633C              | p.X211Y           | 0.26     |     | 0.90       | .              | 0.12 | 8.24E-06       | low                    |                          |
| JM1321     | missense           | nonsynonymous SNV                      | <i>PRDM9</i>    | NM_001310214  | c.G2487T             | p.E829D           | 1.95E-22 |     | -0.42      | T              | 8.5  | ---            | low                    |                          |
| JM1344*    | D-Mis              | nonsynonymous SNV                      | <i>ATP6VOA2</i> | NM_012463     | c.A1184G             | p.N395S           | 4.74E-06 |     | -0.01      | D              | 15.3 | ---            | high                   | autism                   |
| JM1344*    | missense           | nonsynonymous SNV                      | <i>DAB2</i>     | NM_001244871  | c.G1655T             | p.W552L           | 0.98     |     | -1.08      | T              | 18.1 | ---            | medium                 | autism                   |
| JM1416     | missense           | nonsynonymous SNV                      | <i>SPATC1</i>   | NM_001134374  | c.C794T              | p.S265L           | 3.59E-08 |     | -0.78      | T              | 4.97 | 8.74E-06       | low                    |                          |
| JM171      | LGD                | frameshift insertion                   | <i>NUCB1</i>    | NM_006184     | c.567dupT            | p.R189fs          | 4.17E-05 |     | 0.84       | .              | .    | ---            | high                   |                          |
| JM216      | D-Mis              | nonsynonymous SNV                      | <i>SLC25A24</i> | NM_013386     | c.C649T              | p.R217C           | 4.90E-09 |     | 0.21       | D              | 24   | ---            | high                   |                          |
| JM559*     | D-Mis              | nonsynonymous SNV                      | <i>ABCC8</i>    | NM_000352     | c.G2870A             | p.R957H           | 3.94E-15 |     | 2.60       | D              | 26.5 | 1.65E-05       | high                   |                          |
| JM559*     | missense           | nonsynonymous SNV                      | <i>PREX1</i>    | NM_020820     | c.G4069A             | p.E1357K          | 1.00     |     | 4.11       | T              | 17.9 | ---            | medium                 |                          |

| Proband ID | Variant type | Variant Class     | Gene            | Transcript ID | Nucleotide change | AA change | ExAC     | pLI | ExAC mis-z | MetaSVM | CADD | ExAC frequency | Deleterious prediction | Other medical conditions                                                                      |
|------------|--------------|-------------------|-----------------|---------------|-------------------|-----------|----------|-----|------------|---------|------|----------------|------------------------|-----------------------------------------------------------------------------------------------|
| JM630*     | missense     | nonsynonymous SNV | <i>HIRA</i>     | NM_003325     | c.C2173T          | p.R725W   | 1.00     |     | 4.00       | T       | 22.3 | 9.91E-05       | medium                 |                                                                                               |
| JM630*     | LGD          | stopgain          | <i>ZMYM2</i>    | NM_001190965  | c.C1618T          | p.R540X   | 0.97     |     | 1.85       | .       | 41.0 | ---            | high                   |                                                                                               |
| JM758*     | D-Mis        | nonsynonymous SNV | <i>SAMHD1</i>   | NM_015474     | c.C25T            | p.P9S     | 1.50E-05 |     | 2.20       | D       | 7.92 | 0              | high                   |                                                                                               |
| JM758*     | missense     | nonsynonymous SNV | <i>SPTA1</i>    | NM_003126     | c.T6297G          | p.F2099L  | 5.85E-05 |     | -3.70      | T       | 9.61 | 0              | low                    |                                                                                               |
| JM758*     | missense     | nonsynonymous SNV | <i>C19orf68</i> | NM_199341     | c.C229T           | p.R77W    | .        |     | .          | T       | 33.0 | 0              | medium                 |                                                                                               |
| JM852      | LGD          | stopgain          | <i>KEAP1</i>    | NM_012289     | c.C1752A          | p.Y584X   | 0.252    |     | 4.75       | .       | 19.8 | ---            | high                   | incontinentia pigmenti, neonatal seizures, spastic diplegia, developmental delay, sleep apnea |
| JM905      | missense     | nonsynonymous SNV | <i>ADAMTS18</i> | NM_001326358  | c.T303A           | p.F101L   | 3.74E-15 |     | -3.13      | T       | 11.3 | 0              | low                    |                                                                                               |

\*ID, patient carries mutations in more than one candidate gene.

†Variant classifications: LGD, likely gene damaging; D-Mis, damaging missense predicated by MetaSVM; SNV, single nucleotide variant.

‡Annotation toolkit predictions: B, benign; T, tolerant; P, possibly damaging; D, damaging; ., mutation class not included in toolkit.

§!--, mutation not present in ExAC.

**Supplemental Table 6. Lack of enrichment of genome-wide rare variants in pediatric-onset IPAH patients of European ethnicity.**

| <b>Mutation type*</b> | <b>Observed in cases<br/>(n=66)</b> | <b>Observed in<br/>controls<br/>(n=1,319)</b> | <b>Enrichment</b> | <b>p-value</b> |
|-----------------------|-------------------------------------|-----------------------------------------------|-------------------|----------------|
| SYN                   | 3,140                               | 59,864                                        | 1.05              | 1              |
| MIS                   | 5,838                               | 113,810                                       | 1.03              | 1              |
| D-Mis                 | 882                                 | 17,388                                        | 1.01              | 1              |
| LGD                   | 410                                 | 7,597                                         | 1.08              | 0.95           |

\*SYN, synonymous; LGD, likely gene damaging; MIS, all missense; D-Mis, damaging missense predicted by MetaSVM

**Supplemental Table 7. Lack of enrichment of genome-wide rare variants in adult-onset IPAH patients of European ethnicity.**

| <b>Mutation type*</b> | <b>Observed in cases<br/>(n=120)</b> | <b>Observed in<br/>controls<br/>(n=1319)</b> | <b>Enrichment</b> | <b>p-value</b> |
|-----------------------|--------------------------------------|----------------------------------------------|-------------------|----------------|
| <b>SYN</b>            | 5,514                                | 59864                                        | 1.01              | 1              |
| <b>MIS</b>            | 10,538                               | 113810                                       | 1.02              | 1              |
| <b>D-Mis</b>          | 1,621                                | 17,388                                       | 1.02              | 1              |
| <b>LGD</b>            | 680                                  | 7,597                                        | 0.98              | 1              |

\*SYN, synonymous; LGD, likely gene damaging; MIS, all missense; D-Mis, damaging missense predicted by MetaSVM

Supplemental Figure 1. Workflow for the genetic analysis of 412 PAH cases.

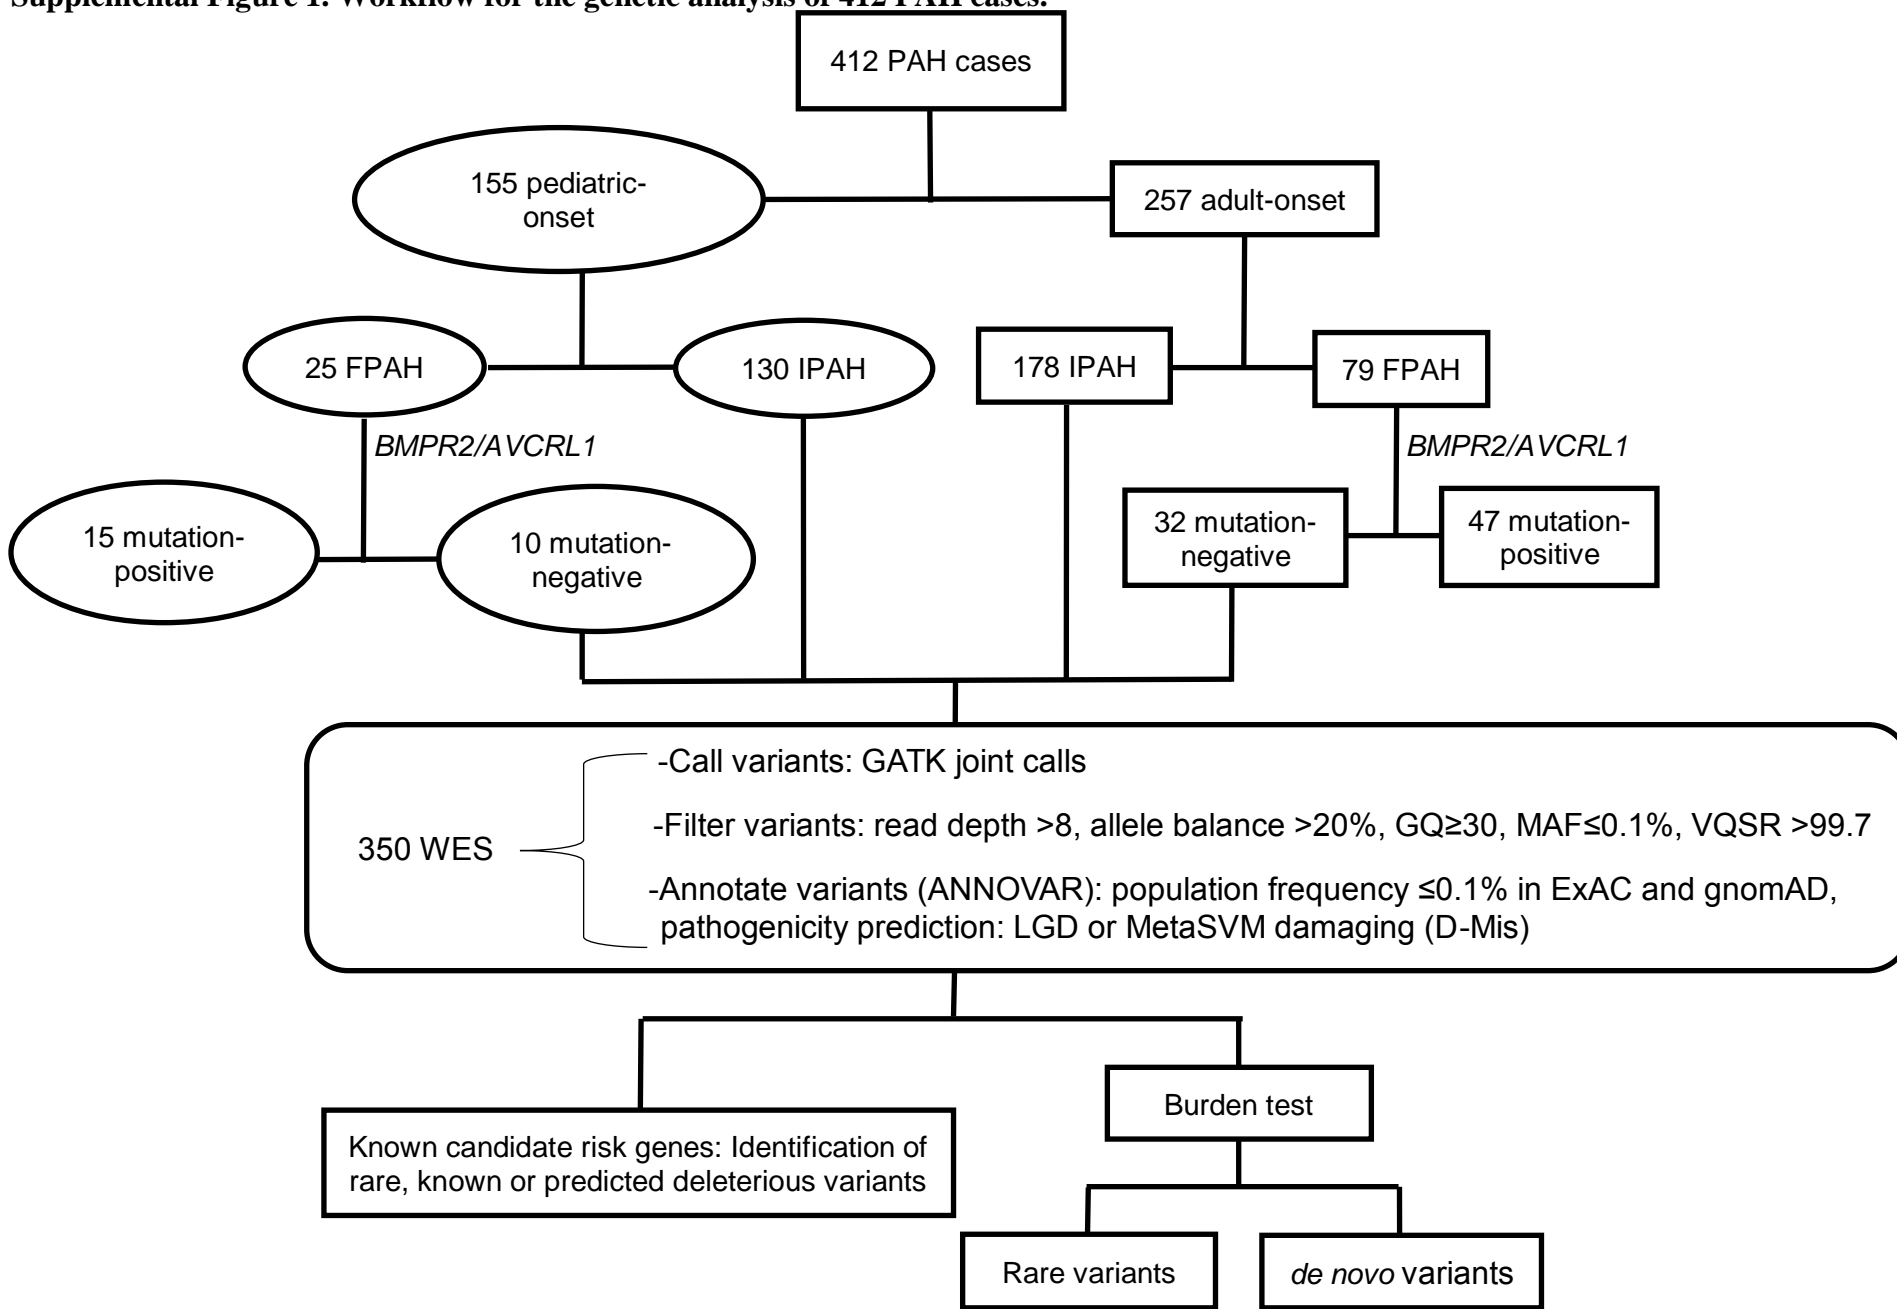

**Supplemental Figure 2. *BMPR2* mutations identified in 412 pediatric- and adult-onset PAH patients. A,** Rare LGD and D-Mis mutations identified in pediatric-onset patients are indicated above the protein schematic; mutations in adult-onset patients are below the schematic. D-Mis, damaging missense mutations predicted by MetaSVM (red), LGD, likely gene damaging (blue), Pkinase, conserved protein kinase domain. **B,** LGD variants occurred more frequently in patients with older age-of-onset compared to D-Mis variants.  $P = 0.0006$ , Mann–Whitney U test.

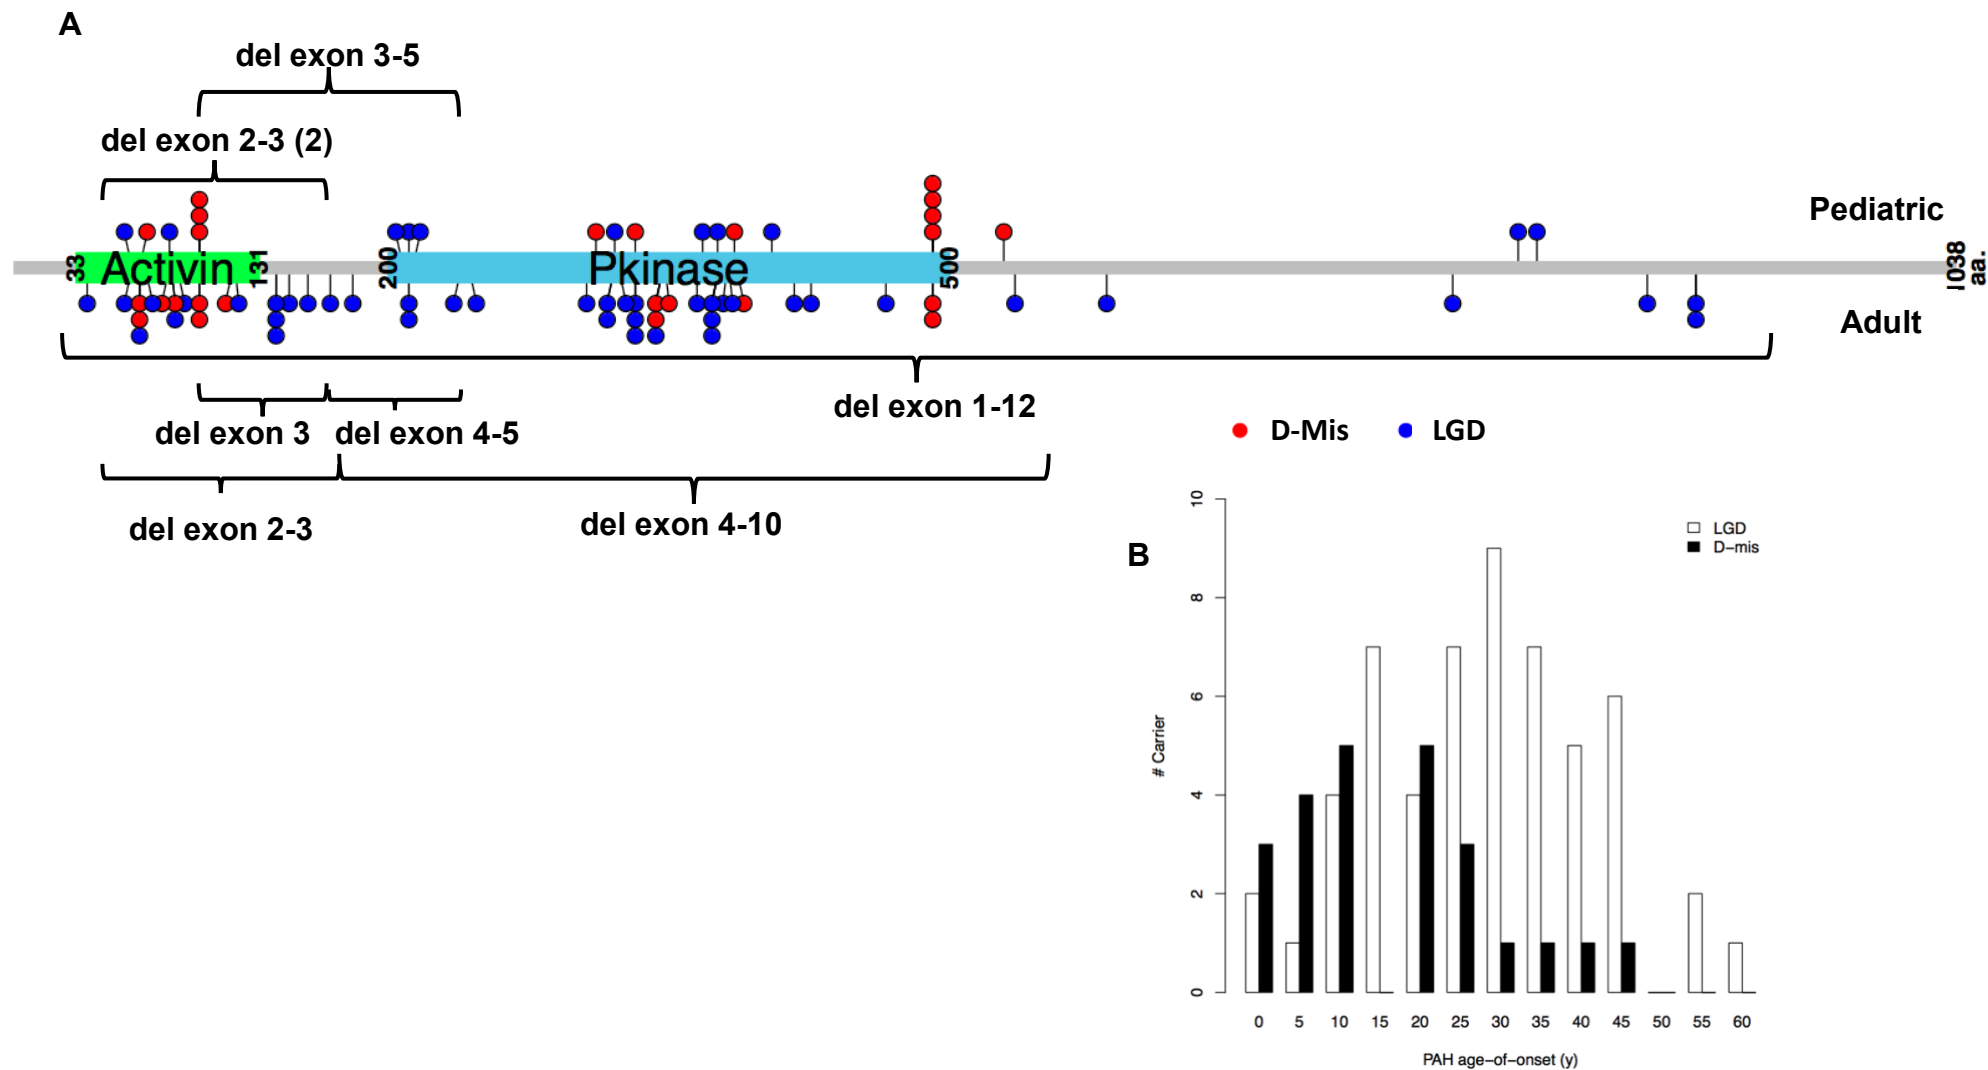



## References

- Abdalla SA, Gallione CJ, Barst RJ, Horn EM, Knowles JA, Marchuk DA, et al. Primary pulmonary hypertension in families with hereditary haemorrhagic telangiectasia. *Eur Respir J*. 2004;23:373-7.
- Berg JN, Gallione CJ, Stenzel TT, Johnson DW, Allen WP, Schwartz CE, et al. The activin receptor-like kinase 1 gene: genomic structure and mutations in hereditary hemorrhagic telangiectasia type 2. *Am J Hum Genet*. 1997;61:60-7.
- Cogan JD, Vnencak-Jones CL, Phillips JA, 3rd, Lane KB, Wheeler LA, Robbins IM, et al. Gross BMPR2 gene rearrangements constitute a new cause for primary pulmonary hypertension. *Genet Med*. 2005;7:169-74.
- Deng Z, Morse JH, Slager SL, Cuervo N, Moore KJ, Venetos G, et al. Familial primary pulmonary hypertension (gene PPH1) is caused by mutations in the bone morphogenetic protein receptor-II gene. *Am J Hum Genet*. 2000;67:737-44.
- Drake KM, Zygmunt D, Mavrakis L, Harbor P, Wang L, Comhair SA, et al. Altered MicroRNA processing in heritable pulmonary arterial hypertension: an important role for Smad-8. *Am J Respir Crit Care Med*. 2011;184:1400-8.
- Jones G, Robertson L, Harrison R, Ridout C and Vasudevan P. Somatic mosaicism in ACVRL1 with transmission to several offspring affected with severe pulmonary arterial hypertension. *Am J Med Genet A*. 2014;164A:2121-3.
- Koehler R, Grunig E, Pauciulo MW, Hoepfer MM, Olschewski H, Wilkens H, et al. Low frequency of BMPR2 mutations in a German cohort of patients with sporadic idiopathic pulmonary arterial hypertension. *J Med Genet*. 2004;41:e127.
- International PPHC, Lane KB, Machado RD, Pauciulo MW, Thomson JR, Phillips JA, 3rd, et al. Heterozygous germline mutations in BMPR2, encoding a TGF-beta receptor, cause familial primary pulmonary hypertension. *Nat Genet*. 2000;26:81-4.
- Ma L, Roman-Campos D, Austin ED, Eyries M, Sampson KS, Soubrier F, et al. A novel channelopathy in pulmonary arterial hypertension. *N Engl J Med*. 2013;369:351-61.
- Machado RD, Aldred MA, James V, Harrison RE, Patel B, Schwalbe EC, et al. Mutations of the TGF-beta type II receptor BMPR2 in pulmonary arterial hypertension. *Hum Mutat*. 2006;27:121-32.
- Machado RD, Eickelberg O, Elliott CG, Geraci MW, Hanaoka M, Loyd JE, et al. Genetics and genomics of pulmonary arterial hypertension. *J Am Coll Cardiol*. 2009;54:S32-42.
- Machado RD, Southgate L, Eichstaedt CA, Aldred MA, Austin ED, Best DH, et al. Pulmonary Arterial Hypertension: A Current Perspective on Established and Emerging Molecular Genetic Defects. *Hum Mutat*. 2015;36:1113-27.
- Morisaki H, Nakanishi N, Kyotani S, Takashima A, Tomoike H and Morisaki T. BMPR2 mutations found in Japanese patients with familial and sporadic primary pulmonary hypertension. *Hum Mutat*. 2004;23:632.

Pfarr N, Szamalek-Hoegel J, Fischer C, Hinderhofer K, Nagel C, Ehlken N, et al. Hemodynamic and clinical onset in patients with hereditary pulmonary arterial hypertension and BMPR2 mutations. *Respir Res.* 2011;12:99.

Roberts KE, McElroy JJ, Wong WP, Yen E, Widlitz A, Barst RJ, et al. BMPR2 mutations in pulmonary arterial hypertension with congenital heart disease. *Eur Respir J.* 2004;24:371-4.

Rosenzweig EB, Morse JH, Knowles JA, Chada KK, Khan AM, Roberts KE, et al. Clinical implications of determining BMPR2 mutation status in a large cohort of children and adults with pulmonary arterial hypertension. *J Heart Lung Transplant.* 2008;27:668-74.

Thomson JR, Machado RD, Pauciulo MW, Morgan NV, Humbert M, Elliott GC, et al. Sporadic primary pulmonary hypertension is associated with germline mutations of the gene encoding BMPR-II, a receptor member of the TGF-beta family. *J Med Genet.* 2000;37:741-5.

Trembath RC, Thomson JR, Machado RD, Morgan NV, Atkinson C, Winship I, et al. Clinical and molecular genetic features of pulmonary hypertension in patients with hereditary hemorrhagic telangiectasia. *N Engl J Med.* 2001;345:325-34.
